# Supplementary material
Source: PubMed Central journal article supplement (PMC3930615)
Supplement: NIHMS550072-supplement-4.pdf [file NIHMS550072-supplement-4.pdf]

**PCR Cancer Array Gene List**

**PCR Array Catalog #:** PARN-033

| Position | Unigene   | Refseq       | Symbol  | Description                                 | Gname                | RT2 Catalog |
|----------|-----------|--------------|---------|---------------------------------------------|----------------------|-------------|
| A01      | Rn.11422  | NM_033230    | Akt1    | V-akt murine thymoma                        | Akt                  | PPR45425B   |
| A02      | Rn.161953 | NM_053546    | Angpt1  | Angiopoietin 1                              | Agpt/Agpt1/Angpt1    | PPR57511B   |
| A03      | Rn.64522  | NM_023979    | Apaf1   | Apoptotic peptididomains 1                  | -                    | PPR06564B   |
| A04      | Rn.214048 | NM_001106821 | Atm     | Ataxia telangiectasia                       | -                    | PPR53729B   |
| A05      | Rn.36696  | NM_022698    | Bad     | BCL2-associated protein 1                   | MGC72439             | PPR06535A   |
| A06      | Rn.10668  | NM_017059    | Bax     | Bcl2-associated protein 4                   | -                    | PPR06496B   |
| A07      | Rn.9996   | NM_016993    | Bcl2    | B-cell CLL/lymphoma 2                       | Bcl-2                | PPR06577A   |
| A08      | Rn.10323  | NM_031535    | Bcl2l1  | Bcl2-like 1                                 | Bcl-xl/Bcl2l1/Bcl2l1 | PPR06491A   |
| A09      | Rn.54471  | NM_022274    | Birc5   | Baculoviral IAP repeat-containing protein 5 | AP14                 | PPR06554E   |
| A10      | Rn.48840  | NM_012514    | Brca1   | Breast cancer 1                             | -                    | PPR06550A   |
| A11      | Rn.54474  | NM_022277    | Casp8   | Caspase 8                                   | -                    | PPR06555A   |
| A12      | Rn.22279  | NM_171992    | Ccnd1   | Cyclin D1                                   | -                    | PPR06517B   |
| B01      | Rn.15455  | NM_001100821 | Ccne1   | Cyclin E1                                   | CYCLE/Ccne           | PPR59960A   |
| B02      | Rn.11390  | NM_133571    | Cdc25a  | Cell division cycle 25A                     | -                    | PPR06400A   |
| B03      | Rn.1303   | NM_031334    | Cdh1    | Cadherin 1                                  | -                    | PPR42461A   |
| B04      | Rn.104460 | NM_199501    | Cdk2    | Cyclin dependent kinase 2                   | -                    | PPR55478A   |
| B05      | Rn.6115   | NM_053593    | Cdk4    | Cyclin-dependent kinase 4                   | -                    | PPR06455B   |
| B06      | Rn.10089  | NM_080782    | Cdkn1a  | Cyclin-dependent kinase inhibitor 1A        | Cip1/Waf1            | PPR06378A   |
| B07      | Rn.48717  | NM_031550    | Cdkn2a  | Cyclin-dependent kinase inhibitor 2A        | Arf/INK4A/MTS1       | PPR06449A   |
| B08      | Rn.204752 | NM_057138    | Cflar   | CASP8 and FADD-like domain containing       | Flip/MGC108616       | PPR06420E   |
| B09      | Rn.163213 | NM_053677    | Chek2   | CHK2 checkpoint kinase                      | Chk2/Rad53           | PPR06509A   |
| B10      | Rn.12030  | XM_241632    | Col18a1 | Collagen, type XVIII                        | -                    | PPR45565A   |
| B11      | Rn.112601 | NM_053357    | Ctnnb1  | Catenin (cadherin cell adhesion molecule)   | Catnb                | PPR57457A   |
| B12      | Rn.72471  | NM_001100778 | E2f1    | E2F transcription factor 1                  | -                    | PPR55684A   |
| C01      | Rn.37227  | NM_031507    | Egfr    | Epidermal growth factor receptor            | ERBB1/ErbB-1/HER1    | PPR48960A   |
| C02      | Rn.164554 | NM_001107107 | Ets2    | V-ets erythroblast transformation           | -                    | PPR48504A   |
| C03      | Rn.88013  | NM_012846    | Fgf1    | Fibroblast growth factor 1                  | HBGF-1/HBGF1         | PPR06631B   |
| C04      | Rn.12732  | NM_001109892 | Fgfr2   | Fibroblast growth factor receptor 2         | -                    | PPR06654E   |
| C05      | Rn.10796  | NM_031761    | Figf    | C-fos induced growth factor                 | Vegf-d               | PPR06656B   |
| C06      | Rn.103750 | NM_022197    | Fos     | FBJ osteosarcoma                            | c-fos                | PPR55248B   |
| C07      | Rn.3360   | NM_030846    | Grb2    | Growth factor receptor tyrosine kinase      | MGC108668            | PPR43063A   |
| C08      | Rn.10468  | NM_017017    | Hgf     | Hepatocyte growth factor                    | HPTA                 | PPR44869B   |

### PCR Cancer Array Gene List

|     |           |              |        |                   |                 |           |
|-----|-----------|--------------|--------|-------------------|-----------------|-----------|
| C09 | Rn.12     | NM_012967    | Icam1  | Intercellular adh | CD54/ICAM       | PPR42235A |
| C10 | Rn.196548 | NM_001014786 | Ifna1  | Interferon-alpha  | IFN-alpha1      | PPR06851A |
| C11 | Rn.138105 | NM_019127    | Ifnb1  | Interferon beta 1 | Ifnb            | PPR06442B |
| C12 | Rn.6282   | NM_178866    | Igf1   | Insulin-like grow | -               | PPR06664E |
| D01 | Rn.83597  | XM_345156    | Itga2  | Integrin, alpha 2 | CD49B           | PPR52451A |
| D02 | Rn.154664 | NM_001108292 | Itga3  | Integrin, alpha 3 | -               | PPR44350A |
| D03 | Rn.12704  | NM_001107737 | Itga4  | Integrin, alpha 4 | -               | PPR55836A |
| D04 | Rn.23339  | NM_001106549 | Itgav  | Integrin, alpha V | Cd51            | PPR47575A |
| D05 | Rn.25733  | NM_017022    | Itgb1  | Integrin, beta 1  | -               | PPR48046E |
| D06 | Rn.162202 | NM_153720    | Itgb3  | Integrin, beta 3  | -               | PPR46423E |
| D07 | Rn.93714  | NM_021835    | Jun    | Jun oncogene      | -               | PPR53221A |
| D08 | Rn.66008  | NM_181692    | Kiss1  | KiSS-1 metastas   | Eseptin         | PPR51615A |
| D09 | Rn.5850   | NM_031643    | Map2k1 | Mitogen activate  | Mek1            | PPR43465A |
| D10 | Rn.2694   | NM_023983    | Mcam   | Melanoma cell a   | Muc18           | PPR42821E |
| D11 | Rn.91829  | NM_001108099 | Mdm2   | Mdm2 p53 bindi    | -               | PPR06687A |
| D12 | Rn.10617  | NM_031517    | Met    | Met proto-oncog   | Hgfr            | PPR44954A |
| E01 | Rn.6422   | NM_031054    | Mmp2   | Matrix metallope  | -               | PPR43605C |
| E02 | Rn.10209  | NM_031055    | Mmp9   | Matrix metallope  | -               | PPR44728B |
| E03 | Rn.5840   | NM_022588    | Mta1   | Metastasis asso   | -               | PPR43464B |
| E04 | Rn.137719 | NM_001100740 | Mta2   | Metastasis asso   | -               | PPR46067A |
| E05 | Rn.10779  | XM_342281    | Muc1   | Mucin 1, cell sur | MGC188069       | PPR51463A |
| E06 | Rn.12072  | NM_012603    | Myc    | Myelocytomatos    | MGC105490/RN    | PPR45580A |
| E07 | Rn.11283  | NM_031521    | Ncam1  | Neural cell adhe  | Cd56/MGC1246    | PPR45346A |
| E08 | Rn.2411   | XM_342346    | Nfkb1  | Nuclear factor of | NF-kB           | PPR42746A |
| E09 | Rn.12550  | NM_001105720 | Nfkbia | Nuclear factor of | RL/IF-1         | PPR45652A |
| E10 | Rn.6236   | NM_138548    | Nme1   | Non-metastatic c  | -               | PPR43551A |
| E11 | Rn.10999  | NM_012801    | Pdgfa  | Platelet-derived  | PDGFACP         | PPR06694B |
| E12 | Rn.198230 | XM_343293    | Pdgfb  | Platelet-derived  | SIS/c-sis       | PPR52586E |
| F01 | Rn.10599  | NM_013005    | Pik3r1 | Phosphoinositide  | PI3KA           | PPR44943F |
| F02 | Rn.6064   | NM_013085    | Plau   | Plasminogen ac    | MGC124931/UP    | PPR43507E |
| F03 | Rn.82711  | NM_017350    | Plaur  | Plasminogen ac    | Par/Plaur3/uPAF | PPR52384A |
| F04 | Rn.22158  | NM_031606    | Pten   | Phosphatase an    | MMAC1/Mmac/1    | PPR47268A |
| F05 | Rn.33262  | NM_012639    | Raf1   | V-raf-leukemia v  | -               | PPR48609A |
| F06 | Rn.55115  | NM_017045    | Rb1    | Retinoblastoma    | -               | PPR06558A |
| F07 | Rn.504    | NM_012618    | S100a4 | S100 calcium-bi   | 18A2/42A/CAPL   | PPR42299A |

### PCR Cancer Array Gene List

|     |           |              |           |                   |                 |           |
|-----|-----------|--------------|-----------|-------------------|-----------------|-----------|
| F08 | Rn.42912  | NM_021696    | Serpib2   | Serpin peptidase  | Pai2a           | PPR49538A |
| F09 | Rn.29367  | NM_012620    | Serpine1  | Serpin peptidase  | PAI1A/Pai1/Pai1 | PPR48309A |
| F10 | Rn.9159   | NM_001105737 | Tek       | TEK tyrosine kin  | Tie-2/Tie2      | PPR44285B |
| F11 | Rn.48802  | NM_053423    | Tert      | Telomerase reve-  |                 | PPR50309A |
| F12 | Rn.40136  | NM_021578    | Tgfb1     | Transforming gro- |                 | PPR06430B |
| G01 | Rn.44402  | NM_012775    | Tgfb1     | Transforming gro  | MGC93659        | PPR06439E |
| G02 | Rn.185771 | NM_001013062 | Thbs1     | Thrombospondin    | TSP-1/Tsp1      | PPR63321C |
| G03 | Rn.25754  | NM_053819    | Timp1     | TIMP metallopro   | TIMP-1/Timp     | PPR48051B |
| G04 | Rn.2275   | NM_012675    | Tnf       | Tumor necrosis    | MGC124630/RA    | PPR06411E |
| G05 | Rn.105558 | NM_001108873 | Tnfrsf10b | Tumor necrosis    | -               | PPR56024A |
| G06 | Rn.11119  | NM_013091    | Tnfrsf1a  | Tumor necrosis    | MGC105478/Tn    | PPR06395A |
| G07 | Rn.162521 | NM_139194    | Fas       | Fas (TNF recept   | Tnfrsf6         | PPR47870E |
| G08 | Rn.54443  | NM_030989    | Tp53      | Tumor protein p   | MGC112612/Trp   | PPR06553A |
| G09 | Rn.161904 | NM_053530    | Twist1    | Twist homolog 1   | Twist           | PPR51549A |
| G10 | Rn.1923   | NM_031836    | Vegfa     | Vascular endothe  | VEGF164/Vegf    | PPR06748B |
| G11 | Rn.198550 | NM_053549    | Vegfb     | Vascular endothe  | -               | PPR51827A |
| G12 | Rn.6913   | NM_053653    | Vegfc     | Vascular endothe  | -               | PPR06749B |
| H01 | Rn.973    | NM_001007604 | Rplp1     | Ribosomal prote   | MGC72935        | PPR42363B |
| H02 | Rn.47     | NM_012583    | Hprt1     | Hypoxanthine ph   | Hgprtase/Hprt/M | PPR42247E |
| H03 | Rn.92211  | NM_173340    | Rpl13a    | Ribosomal prote   | -               | PPR53027A |
| H04 | Rn.107896 | NM_017025    | Ldha      | Lactate dehydro   | Ldh1            | PPR56603B |
| H05 | Rn.94978  | NM_031144    | Actb      | Actin, beta       | Actx            | PPR06570B |
| H06 | N/A       | U26919       | RGDC      | Rat Genomic DN    | RGDC            |           |
| H07 | N/A       | SA_00104     | RTC       | Reverse Transcr   | RTC             |           |
| H08 | N/A       | SA_00104     | RTC       | Reverse Transcr   | RTC             |           |
| H09 | N/A       | SA_00104     | RTC       | Reverse Transcr   | RTC             |           |
| H10 | N/A       | SA_00103     | PPC       | Positive PCR Cd   | PPC             |           |
| H11 | N/A       | SA_00103     | PPC       | Positive PCR Cd   | PPC             |           |
| H12 | N/A       | SA_00103     | PPC       | Positive PCR Cd   | PPC             |           |
