# Supplementary material
Source: PubMed Central journal article supplement (PMC3930615)
Supplement: NIHMS550072-supplement-5.pdf [file NIHMS550072-supplement-5.pdf]

**RELATIVE EXPRESSION OF CANCER-RELATED GENES IN Delta IgTRKB HCM-1 COMPARED TO GFP-HCM-1**

**Fold Change (comparing ΔIgTrkB HCM-1 to GFP HCM-1)**

| Position | Symbol  | Group 1     |                  | Comments | P Value  | Fold Regulation | Comments |
|----------|---------|-------------|------------------|----------|----------|-----------------|----------|
|          |         | Fold Change | 95% CI           |          |          |                 |          |
| A01      | Akt1    | 0.6711      | ( 0.51, 0.83 )   | OKAY     | 0.033147 | -1.4901         | OKAY     |
| A02      | Angpt1  | 12.2545     | ( 4.07, 20.44 )  | OKAY     | 0.003952 | 12.2545         | OKAY     |
| A03      | Apaf1   | 0.8603      | ( 0.79, 0.93 )   | OKAY     | 0.021533 | -1.1623         | OKAY     |
| A04      | Atm     | 0.88        | ( 0.68, 1.08 )   | OKAY     | 0.327008 | -1.1364         | OKAY     |
| A05      | Bad     | 0.6361      | ( 0.54, 0.73 )   | OKAY     | 0.00434  | -1.572          | OKAY     |
| A06      | Bax     | 0.6677      | ( 0.53, 0.80 )   | OKAY     | 0.023795 | -1.4976         | OKAY     |
| A07      | Bcl2    | 0.3496      | ( 0.29, 0.41 )   | OKAY     | 0.000206 | -2.8607         | OKAY     |
| A08      | Bcl2l1  | 0.4178      | ( 0.35, 0.49 )   | OKAY     | 0.000418 | -2.3933         | OKAY     |
| A09      | Birc5   | 0.6936      | ( 0.63, 0.76 )   | OKAY     | 0.002713 | -1.4417         | OKAY     |
| A10      | Brca1   | 0.8585      | ( 0.70, 1.01 )   | OKAY     | 0.160047 | -1.1649         | OKAY     |
| A11      | Casp8   | 0.8993      | ( 0.87, 0.93 )   | OKAY     | 0.005277 | -1.112          | OKAY     |
| A12      | Ccnd1   | 331.0042    | 294.74, 367.27   | A        | 0        | 331.0042        | A        |
| B01      | Ccne1   | 0.2792      | ( 0.25, 0.31 )   | OKAY     | 0.000213 | -3.5812         | OKAY     |
| B02      | Cdc25a  | 1.0062      | ( 0.80, 1.22 )   | OKAY     | 0.985934 | 1.0062          | OKAY     |
| B03      | Cdh1    | 0.6477      | ( 0.48, 0.82 )   | OKAY     | 0.034125 | -1.544          | OKAY     |
| B04      | Cdk2    | 0.7285      | ( 0.64, 0.81 )   | OKAY     | 0.003601 | -1.3728         | OKAY     |
| B05      | Cdk4    | 0.8427      | ( 0.65, 1.03 )   | OKAY     | 0.204136 | -1.1867         | OKAY     |
| B06      | Cdkn1a  | 0.6605      | ( 0.63, 0.70 )   | OKAY     | 0.000064 | -1.514          | OKAY     |
| B07      | Cdkn2a  | 0.984       | ( 0.90, 1.07 )   | OKAY     | 0.721688 | -1.0163         | OKAY     |
| B08      | Cflar   | 0.7249      | ( 0.65, 0.80 )   | OKAY     | 0.004653 | -1.3796         | OKAY     |
| B09      | Chek2   | 1.2659      | ( 1.08, 1.45 )   | OKAY     | 0.037384 | 1.2659          | OKAY     |
| B10      | Col18a1 | 1.3365      | ( 0.65, 2.02 )   | OKAY     | 0.342765 | 1.3365          | OKAY     |
| B11      | Ctnnb1  | 0.6716      | ( 0.59, 0.76 )   | OKAY     | 0.006962 | -1.4891         | OKAY     |
| B12      | E2f1    | 0.832       | ( 0.70, 0.96 )   | OKAY     | 0.086664 | -1.202          | OKAY     |
| C01      | Egfr    | 0.6948      | ( 0.53, 0.86 )   | C        | 0.056255 | -1.4394         | C        |
| C02      | Ets2    | 0.3158      | ( 0.27, 0.36 )   | OKAY     | 0.000017 | -3.1663         | OKAY     |
| C03      | Fgf1    | 3.81        | ( 3.20, 4.42 )   | OKAY     | 0.000097 | 3.81            | OKAY     |
| C04      | Fgf2    | 0.0778      | ( 0.06, 0.10 )   | OKAY     | 0.000009 | -12.8596        | OKAY     |
| C05      | Figf    | 1.5599      | ( 1.03, 2.09 )   | B        | 0.081262 | 1.5599          | B        |
| C06      | Fos     | 0.3314      | ( 0.29, 0.37 )   | OKAY     | 0.000072 | -3.0172         | OKAY     |
| C07      | Grb2    | 0.463       | ( 0.43, 0.49 )   | OKAY     | 0.000009 | -2.1598         | OKAY     |
| C08      | Hgf     | 28.8628     | ( 15.25, 42.48 ) | A        | 0.008818 | 28.8628         | A        |

**RELATIVE EXPRESSION OF CANCER-RELATED GENES IN Delta IgTRKB HCM-1 COMPARED TO GFP-HCM-1**

|     |        |        |                   |      |          |         |      |
|-----|--------|--------|-------------------|------|----------|---------|------|
| C09 | Icam1  | 0.8024 | ( 0.64, 0.96 )    | OKAY | 0.09479  | -1.2462 | OKAY |
| C10 | Ifna1  | 0.5962 | ( 0.43, 0.76 )    | OKAY | 0.031622 | -1.6773 | OKAY |
| C11 | Ifnb1  | 0.6948 | ( 0.53, 0.86 )    | C    | 0.056255 | -1.4394 | C    |
| C12 | Igf1   | 1.2033 | ( 0.99, 1.42 )    | OKAY | 0.110241 | 1.2033  | OKAY |
| D01 | Itga2  | 2.0379 | ( 0.00001, 4.42 ) | B    | 0.240529 | 2.0379  | B    |
| D02 | Itga3  | 3.2204 | ( 2.84, 3.60 )    | OKAY | 0.000003 | 3.2204  | OKAY |
| D03 | Itga4  | 2.6461 | ( 2.29, 3.01 )    | OKAY | 0.000616 | 2.6461  | OKAY |
| D04 | Itgav  | 0.7198 | ( 0.49, 0.95 )    | OKAY | 0.103062 | -1.3892 | OKAY |
| D05 | Itgb1  | 0.8033 | ( 0.75, 0.86 )    | OKAY | 0.003023 | -1.2449 | OKAY |
| D06 | Itgb3  | 1.3199 | ( 1.13, 1.51 )    | OKAY | 0.014714 | 1.3199  | OKAY |
| D07 | Jun    | 0.6971 | ( 0.62, 0.78 )    | OKAY | 0.005623 | -1.4344 | OKAY |
| D08 | Kiss1  | 0.8025 | ( 0.45, 1.16 )    | B    | 0.44723  | -1.2461 | B    |
| D09 | Map2k1 | 0.9434 | ( 0.80, 1.09 )    | OKAY | 0.49754  | -1.06   | OKAY |
| D10 | Mcam   | 0.8277 | ( 0.78, 0.88 )    | OKAY | 0.004231 | -1.2082 | OKAY |
| D11 | Mdm2   | 0.4271 | ( 0.40, 0.46 )    | OKAY | 0.000028 | -2.3412 | OKAY |
| D12 | Met    | 1.5722 | ( 1.42, 1.72 )    | OKAY | 0.000925 | 1.5722  | OKAY |
| E01 | Mmp2   | 1.2279 | ( 1.00, 1.46 )    | OKAY | 0.115956 | 1.2279  | OKAY |
| E02 | Mmp9   | 2.7324 | ( 0.38, 5.08 )    | B    | 0.099061 | 2.7324  | B    |
| E03 | Mta1   | 0.8157 | ( 0.71, 0.92 )    | OKAY | 0.044843 | -1.2259 | OKAY |
| E04 | Mta2   | 0.6971 | ( 0.63, 0.76 )    | OKAY | 0.003718 | -1.4345 | OKAY |
| E05 | Muc1   | 4.8839 | ( 3.71, 6.05 )    | OKAY | 0.00003  | 4.8839  | OKAY |
| E06 | Myc    | 1.2005 | ( 0.00001, 2.56 ) | B    | 0.729366 | 1.2005  | B    |
| E07 | Ncam1  | 0.9485 | ( 0.64, 1.26 )    | OKAY | 0.747884 | -1.0543 | OKAY |
| E08 | Nfkb1  | 0.9427 | ( 0.82, 1.07 )    | OKAY | 0.45719  | -1.0608 | OKAY |
| E09 | Nfkbia | 0.7632 | ( 0.64, 0.88 )    | OKAY | 0.025716 | -1.3103 | OKAY |
| E10 | Nme1   | 0.9041 | ( 0.86, 0.95 )    | OKAY | 0.012676 | -1.1061 | OKAY |
| E11 | Pdgfa  | 0.4972 | ( 0.32, 0.67 )    | OKAY | 0.014808 | -2.0111 | OKAY |
| E12 | Pdgfb  | 0.6596 | ( 0.57, 0.75 )    | A    | 0.002921 | -1.5162 | A    |
| F01 | Pik3r1 | 0.5227 | ( 0.46, 0.58 )    | OKAY | 0.000261 | -1.9131 | OKAY |
| F02 | Plau   | 0.3997 | ( 0.29, 0.51 )    | A    | 0.010559 | -2.502  | A    |
| F03 | Plaur  | 0.8447 | ( 0.75, 0.94 )    | OKAY | 0.03657  | -1.1839 | OKAY |
| F04 | Pten   | 0.5849 | ( 0.54, 0.63 )    | OKAY | 0.000285 | -1.7098 | OKAY |
| F05 | Raf1   | 0.6613 | ( 0.55, 0.78 )    | OKAY | 0.018242 | -1.5121 | OKAY |
| F06 | Rb1    | 0.5646 | ( 0.51, 0.62 )    | OKAY | 0.000464 | -1.771  | OKAY |
| F07 | S100a4 | 0.5091 | ( 0.45, 0.57 )    | OKAY | 0.00049  | -1.9641 | OKAY |

**RELATIVE EXPRESSION OF CANCER-RELATED GENES IN Delta IgTRKB HCM-1 COMPARED TO GFP-HCM-1**

|     |           |         |                  |      |          |         |      |
|-----|-----------|---------|------------------|------|----------|---------|------|
| F08 | Serpib2   | 0.6948  | ( 0.53, 0.86 )   | C    | 0.056255 | -1.4394 | C    |
| F09 | Serpine1  | 4.6608  | ( 3.80, 5.52 )   | OKAY | 0.000027 | 4.6608  | OKAY |
| F10 | Tek       | 2.2423  | ( 1.33, 3.15 )   | A    | 0.020516 | 2.2423  | A    |
| F11 | Tert      | 1.32    | ( 0.98, 1.66 )   | OKAY | 0.100349 | 1.32    | OKAY |
| F12 | Tgfb1     | 0.9707  | ( 0.84, 1.10 )   | OKAY | 0.668129 | -1.0302 | OKAY |
| G01 | Tgfr1     | 0.5698  | ( 0.49, 0.65 )   | OKAY | 0.001248 | -1.755  | OKAY |
| G02 | Thbs1     | 0.4721  | ( 0.42, 0.52 )   | OKAY | 0.000563 | -2.1183 | OKAY |
| G03 | Timp1     | 0.7597  | ( 0.65, 0.87 )   | OKAY | 0.01583  | -1.3163 | OKAY |
| G04 | Tnf       | 1.2705  | ( 0.85, 1.69 )   | B    | 0.212688 | 1.2705  | B    |
| G05 | Tnfrsf10b | 2.9606  | ( 2.37, 3.56 )   | OKAY | 0.000145 | 2.9606  | OKAY |
| G06 | Tnfrsf1a  | 1.074   | ( 0.83, 1.32 )   | OKAY | 0.615624 | 1.074   | OKAY |
| G07 | Fas       | 0.72    | ( 0.55, 0.89 )   | B    | 0.059538 | -1.3889 | B    |
| G08 | Tp53      | 0.8027  | ( 0.66, 0.94 )   | OKAY | 0.080759 | -1.2458 | OKAY |
| G09 | Twist1    | 38.5679 | ( 23.45, 53.68 ) | A    | 0.000015 | 38.5679 | A    |
| G10 | Vegfa     | 4.816   | ( 3.26, 6.37 )   | OKAY | 0.000115 | 4.816   | OKAY |
| G11 | Vegfb     | 1.8261  | ( 1.53, 2.13 )   | OKAY | 0.005226 | 1.8261  | OKAY |
| G12 | Vegfc     | 0.2969  | ( 0.05, 0.55 )   | OKAY | 0.018051 | -3.3679 | OKAY |
| H01 | Rplp1     | 0.909   | ( 0.85, 0.96 )   | OKAY | 0.034638 | -1.1001 | OKAY |
| H02 | Hprt1     | 1.0348  | ( 0.96, 1.11 )   | OKAY | 0.429036 | 1.0348  | OKAY |
| H03 | Rpl13a    | 1.0249  | ( 0.92, 1.13 )   | OKAY | 0.674153 | 1.0249  | OKAY |
| H04 | Ldha      | 1.3041  | ( 1.20, 1.41 )   | OKAY | 0.003074 | 1.3041  | OKAY |
| H05 | Actb      | 0.7955  | ( 0.73, 0.86 )   | OKAY | 0.006687 | -1.2571 | OKAY |
| H06 | RGDC      | 0.6512  | ( 0.50, 0.80 )   | OKAY | 0.026663 | -1.5356 | OKAY |
| H07 | RTC       | 0.7213  | ( 0.58, 0.87 )   | OKAY | 0.044468 | -1.3864 | OKAY |
| H08 | RTC       | 0.6846  | ( 0.55, 0.82 )   | OKAY | 0.029512 | -1.4608 | OKAY |
| H09 | RTC       | 0.7065  | ( 0.57, 0.85 )   | OKAY | 0.036775 | -1.4154 | OKAY |
| H10 | PPC       | 0.712   | ( 0.51, 0.91 )   | OKAY | 0.089911 | -1.4046 | OKAY |
| H11 | PPC       | 0.7281  | ( 0.54, 0.91 )   | OKAY | 0.089716 | -1.3735 | OKAY |
| H12 | PPC       | 0.7509  | ( 0.54, 0.97 )   | OKAY | 0.131062 | -1.3317 | OKAY |

**Comments:**

## RELATIVE EXPRESSION OF CANCER-RELATED GENES IN Delta IgTRKB HCM-1 COMPARED TO GFP-HCM-1

A: This gene's average threshold cycle is relatively high ( $> 30$ ) in either the control or the test sample, and is reasonably low in the other sample ( $< 30$ ).

These data mean that the gene's expression is relatively low in one sample and reasonably detected in the other sample suggesting that the actual fold-change value is at least as large as the calculated and reported fold-change result.

## RELATIVE EXPRESSION OF CANCER-RELATED GENES IN Delta IgTRKB HCM-1 COMPARED TO GFP-HCM-1

This fold-change result may also have greater variations if p value > 0.05; therefore, it is important to have a sufficient number of biological replicates to validate the result for this gene.

B: This gene's average threshold cycle is relatively high (> 30), meaning that its relative expression level is low, in both control and test samples, and the p-value for the fold-change is either unavailable or relatively high ( $p > 0.05$ ).

## RELATIVE EXPRESSION OF CANCER-RELATED GENES IN Delta IgTRKB HCM-1 COMPARED TO GFP-HCM-1

This fold-change result may also have greater variations; therefore, it is important to have a sufficient number of biological replicates to validate the result for this gene.

C: This gene's average threshold cycle is either not determined or greater than the defined cut-off value (default 35), in both samples meaning that its expression was undetected, making this fold-change result erroneous and uninterpretable.

# RELATIVE EXPRESSION OF CANCER-RELATED GENES IN Delta IgTRKB HCM-1 COMPARED TO GFP-HCM-1

## Fold Change & Fold Regulat

Fold-Change  
( $2^{-(\Delta\Delta Ct)}$ ) is the  
normalized  
gene  
expression ( $2^{-(\Delta Ct)}$ ) in the  
Test Sample  
divided the  
normalized  
gene  
expression ( $2^{-(\Delta Ct)}$ ) in the  
Control Sample.

## RELATIVE EXPRESSION OF CANCER-RELATED GENES IN Delta IgTRKB HCM-1 COMPARED TO GFP-HCM-1

Fold-Regulation represents fold-change results in a biologically meaningful way. Fold-change values greater than one indicate a positive- or an up-regulation, and the fold-regulation is equal to the fold change.

Fold-change values less than one indicate a negative or down-regulation, and the fold-regulation is the negative inverse of the fold-change.



**RELATIVE EXPRESSION OF CANCER-RELATED GENES IN Delta IgTRKB HCM-1 COMPARED TO GFP-HCM-1**

Fold-change  
and fold-  
regulation  
values greater  
than 2 are  
indicated in red;  
fold-change  
values less than  
0.5 and fold-  
regulation  
values less than  
-2 are indicated  
in blue.
